# Supplementary material for: Functional metabolomics as a tool to analyze Mediator function and structure in plants
Source: PubMed Central journal article supplement (PMC5480960; doi:10.1371/journal.pone.0179640), 2017-06-22

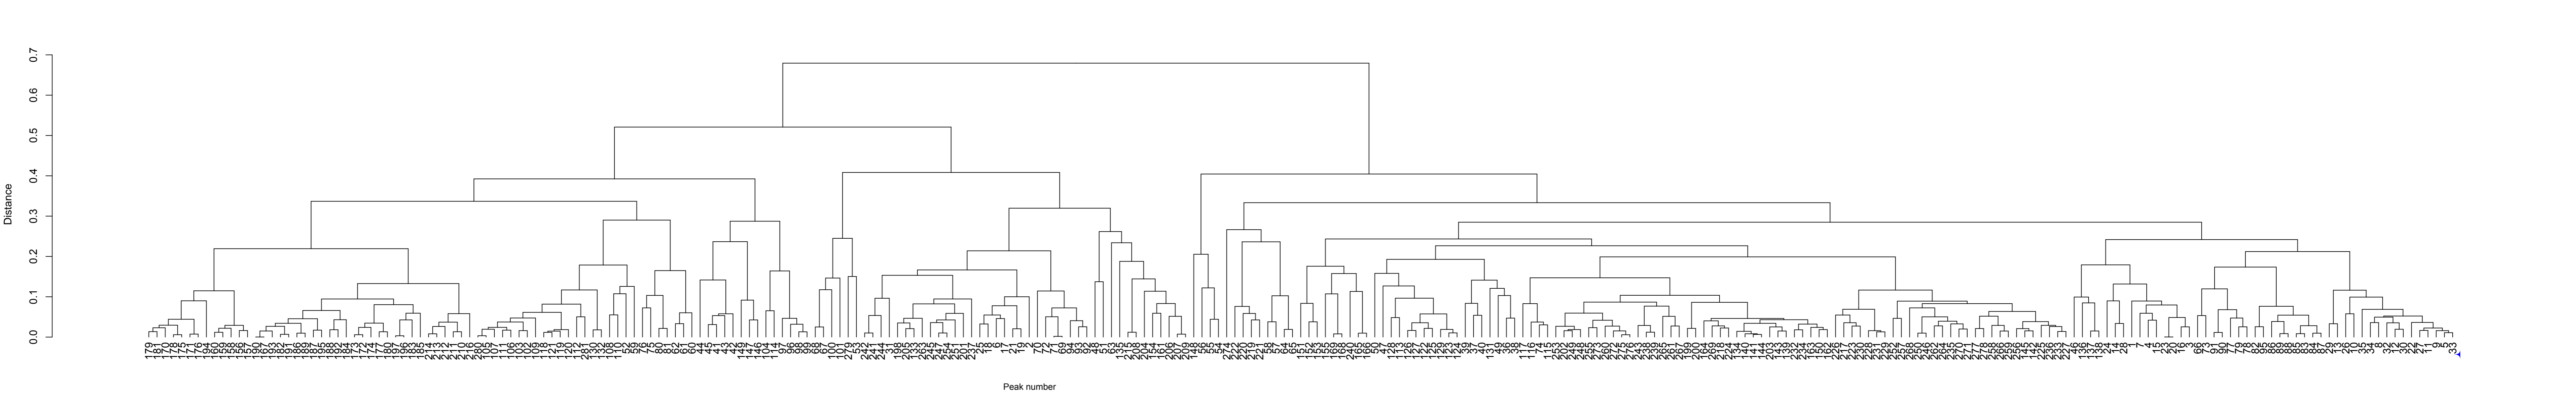

Supplement: pone.0179640.s002.pdf [file pone.0179640.s002.pdf]
