# Supplementary material for: Functional metabolomics as a tool to analyze Mediator function and structure in plants
Source: PLoS One. 2017 Jun 22;12(6):e0179640. doi: 10.1371/journal.pone.0179640 (PMC5480960; doi:10.1371/journal.pone.0179640)
Supplement: S6 Table — (XLSX) [file pone.0179640.s009.xlsx]

## Sheet: Sheet1
Supplementary Table S6. Glucosinolates and breakdown products identified in the experiments by LC-MS in negative or positive mode*
Annotation	[M]	Elemental Composition	RT	[M-H]	M-H (Theor)	[M+H]	Adduct	MSMS
3-Methylsulfinyl propyl GS	423.032	C11H21O10NS3	0.61	422.024	422.026
5-Methylsulfinyl pentyl GS	451.063	C13H25O10NS3	0.98	450.057	450.057
Methoxyindol-3-ylmethyl GS	464.055	C16H20O10 N2 S2	1.83	463.048	463.049
Phenylalanine	165.078	C9H11NO2	1.3	164.071	164.072		M-H	164.0713, 147.0441, 103.0550
3-Indolylmethyl GS	448.06	C16H20O9N2S2	2.1	447.053	447.053		M-H	447.0535, 96.9599
7-Methylsulfinyl heptyl GS	479.095	C15H29O10NS3	1.97	478.087	478.087
4-Hydroxyindol 3-ylmethyl GS	478.071	C17H22O10N2S2	2.93	477.064	477.064		M-H	477.0633, 259.0138, 96.9599
8-(Methylsulfinyl)octanenitrile oxide	187.102	C9H17ONS	3.29		186.096	188.11	M+H	188.1109, 124.1123, 107.0856, 79.0543
tryptophan	204.089	C11H12O2N2	1.89	203.082	203.083	205.097	M+H	188.0707, 146.0599
1-methoxyindol-3-ylmethylGS	479.131	C16H33NO9S3	4.025	478.123	478.125
8-Methylsulfinyl octyl- GS	493.11	C16H31O10NS3	2.62	492.103	492.104	494.12	M-H	492.1031, 428.1034, 96.9599
9-methylthiononanenitrile	137.12	C9H15N	6.31		136.113	138.128	M+H	138.1281, 121.0403, 96.0803
8-Methylthio octyl GS	477.115	C16H31O9NS3	5.6	476.108	476.109
8-Methylsulphinyloctyl nitrile	169.092	C9H15NS	7.89		168.085	170.1	M+H	170.1001, 137.1199, 69.0700
Salicylic acid glucoside	300.085	C13H16O8	2.3	299.076	299.077		M-H	299.0764, 137.0241
* when no MSMS was obtained, the identification was done by comparison with the theoretical mass calculated by Xcalibur software.
